# Supplementary material for: Breast metastatic tumors in lung can be substituted by lung-derived malignant cells transformed by alternative splicing H19 lncRNA
Source: Springer Nature journal article supplement (doi:10.1186/s13058-023-01662-z), 2023-05-30
Supplement: MOESM5 [file 25423662]

Table S1 Lung metastasis after DT treatment

| Time point<br>(DT injection) | Time<br>(after DT injection) | Number<br>(mice) | Number<br>(lung metastasis) |
|------------------------------|------------------------------|------------------|-----------------------------|
| 12 weeks old                 | 0 week                       | 10               | 2.80±0.79                   |
|                              | 1 week                       | 10               | 0                           |
|                              | 2 weeks                      | 10               | 0                           |
| 14 weeks old                 | 0 week                       | 10               | 4.90±0.74                   |
|                              | 1 week                       | 10               | 0                           |
|                              | 2 weeks                      | 10               | 0                           |
| 16 weeks old                 | 0 week                       | 10               | 8.60±0.96                   |
|                              | 1 week                       | 10               | 4.90±1.19                   |
|                              | 2 weeks                      | 9                | 6.44±1.25                   |
| 18 weeks old                 | 0 week                       | 10               | 13.1±1.20                   |
|                              | 1 week                       | 8                | 8.75±1.28                   |
|                              | 2 weeks                      | 6                | 10±1.89                     |
