# Supplementary material for: Breast metastatic tumors in lung can be substituted by lung-derived malignant cells transformed by alternative splicing H19 lncRNA
Source: Springer Nature journal article supplement (doi:10.1186/s13058-023-01662-z), 2023-05-30
Supplement: MOESM11 [file 25423662]

Table S2 The highly expressed LncRNAs in the exosomes from M-MDC cells

| <b>LncRNA</b> | <b>Fold change</b> | <b>P-value</b> | <b>FDR</b>  |
|---------------|--------------------|----------------|-------------|
| FR0257520     | 63.19984367        | 0.000455424    | 0.000154841 |
| FR0201871     | 27.27374206        | 0.00325061     | 0.000234135 |
| FR0402396     | 22.57137273        | 0.000734269    | 1.22169E-05 |
| FR0041840     | 19.74995116        | 0.00160044     | 6.99331E-05 |
| FR0407528     | 17.86900342        | 0.0042033      | 0.00031761  |
| FR0241205     | 16.92852955        | 0.00607522     | 0.000807964 |
| FR0378527 H19 | 12.51786756        | 0.00164701     | 0.000950862 |
| FR0059284     | 8.06120455         | 0.000776735    | 0.000316686 |
| FR0212673     | 6.348198585        | 0.00149182     | 0.00060579  |
| FR0186572     | 6.191452939        | 0.00289472     | 0.000838163 |
| FR0019280     | 5.980449189        | 0.00242636     | 0.000939276 |
| FR0028402     | 5.642843188        | 0.00458618     | 0.000190211 |
| FR0185138     | 4.937487786        | 0.00166215     | 0.000414024 |
| FR0203919     | 3.174099291        | 0.0088231      | 0.000419745 |
| FR0328380     | 3.117215792        | 0.00236524     | 0.000240157 |
| FR0299679     | 2.945635121        | 0.0017727      | 0.000245125 |
| FR0344267     | 2.821421592        | 0.00581308     | 0.000224506 |
| FR0365848     | 2.477345788        | 0.00524869     | 0.000128837 |
| FR0265053     | 2.257137274        | 0.00160205     | 0.000136848 |
| FR0154071     | 2.116066194        | 0.00385161     | 0.000589374 |
